# Supplementary material for: A novel 3D POMOF based on Wells–Dawson arsenomolybdates with excellent photocatalytic and lithium-ion battery performance
Source: Royal Society of Chemistry journal article supplement (doi:10.1039/c7ce01734k), 2017-01-01
Supplement: c7ce01734k1.pdf [file c7ce01734k1.pdf]

## Electronic Supplementary Information (ESI)

### **A novel 3D POMOFs based on Wells-Dawson arsenomolybdates with excellent photocatalytic and lithium-ion batteries performance**

**Bo-Wen Cong,<sup>[a]</sup> Zhan-Hua Su,<sup>\* [a]</sup> Zhi-Feng Zhao,<sup>\*[b]</sup> and Bo Wang<sup>\*[c]</sup>**

*<sup>a</sup>Key Laboratory of Synthesis of Functional Materials and Green Catalysis, Colleges of Heilongjiang Province, Harbin Normal University, Harbin 150025, China*

*<sup>b</sup>College of Material Science and Engineering, Heilongjiang University of Science and Technology, Harbin 150022, China.*

*<sup>c</sup>MIIT Key Laboratory of Critical Materials Technology for New Energy Conversion and Storage, School of Chemistry and Chemical Engineering, Harbin Institute of Technology, 150001 Harbin, China.*

\*Corresponding author. Tel: +86-0451-88060173.

\*E-mail : su\_zhan\_hua@163.com

\*E-mail : zhifengzhao1980@163.com

\*E-mail : wangbo19880804@163.com

**Table S1** The summary of organic ligands in Wells-Dawson-AMs.

| <i>Ref.</i> | <i>Compounds</i>                                                                    | <i>Ligands</i>                                                                                                 | <i>Ref.</i> | <i>Compounds</i>                                                                     | <i>Ligands</i>                                                                                                                                                                           |
|-------------|-------------------------------------------------------------------------------------|----------------------------------------------------------------------------------------------------------------|-------------|--------------------------------------------------------------------------------------|------------------------------------------------------------------------------------------------------------------------------------------------------------------------------------------|
| 27          | 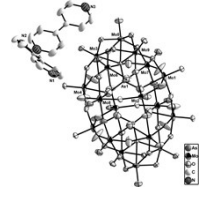   | <br>4,4'-bipyridine           | 30          |    | <br>imidazole                                                                                         |
| 28          |    | <br>3-(2-pyridyl)-1H-pyrazole | 31          |    | <br>2,2'-bipyridine<br>4,4'-bipyridine<br>imidazole<br>pyrazole<br>1,5-bis(1,2,4-triazol-1-yl)pentane |
| 29          |    | <br>imidazole                 | 32          |    | <br>1,4-bis(methyl-1,2,4-triazol-1-yl)benzene                                                         |
| 15          |  | <br>pyrazole                | 33          |  | <br>4,4'-bipyridine                                                                                 |

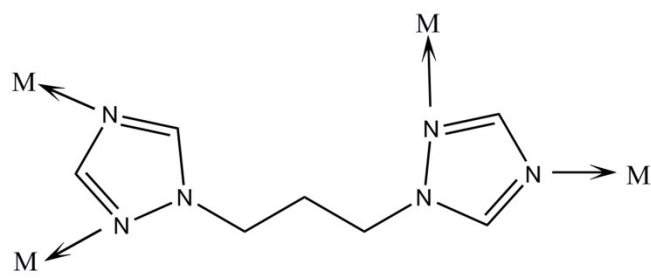

1,3-bis(1,2,4-triazol-1-yl)propane

**Fig. S1** View of the typical coordination modes of btp ligand.

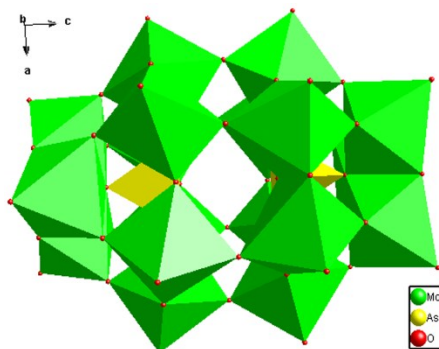

**Fig. S2** Representation of  $[\text{As}_2\text{Mo}_{18}\text{O}_{62}]^{6-}$  cluster coordination polyhedron.

**Table S2.** The BVS calculation result of As Mo and Cu atoms in compound **1**.

| Code       | Bond Valence |
|------------|--------------|
| <b>Mo1</b> | <b>6.103</b> |
| <b>Mo2</b> | <b>6.267</b> |
| <b>Mo3</b> | <b>5.827</b> |
| <b>As1</b> | <b>5.174</b> |
| <b>Cu1</b> | <b>2.057</b> |

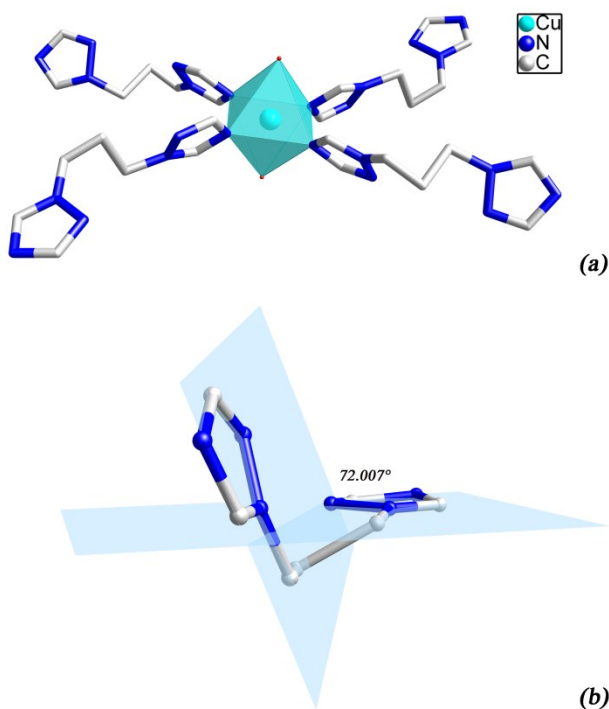

**Fig. S3** (a)The connection between copper and organic ligand btp; (b) The dihedral angles between the two triazole rings.

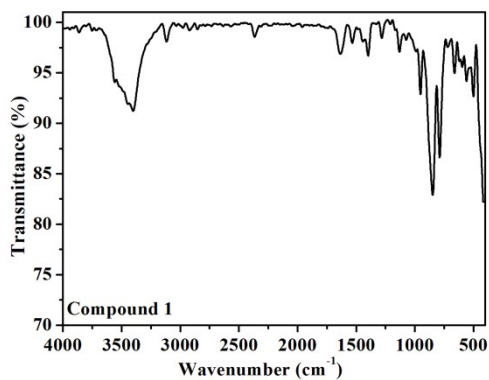

Fig. S4 IR spectrum of compound 1.

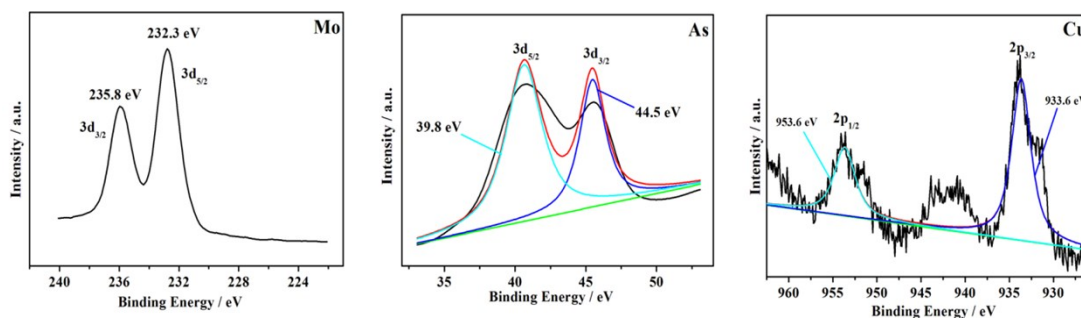

Fig. S5 The XPS spectra of compound 1.

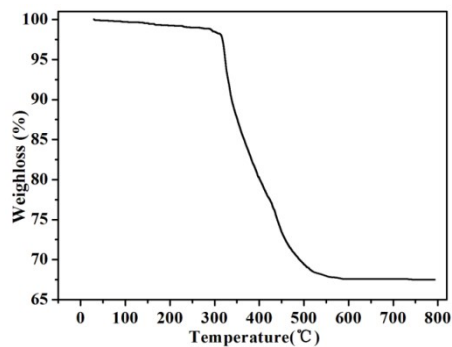

Fig. S6 The TG curve of compound 1.

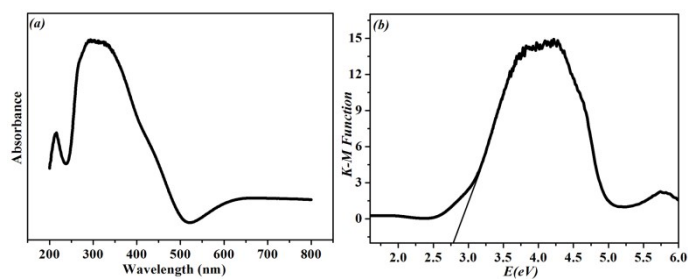

Fig. S7 (a) The UV-vis spectra of compound 1 in solid state at room temperature; (b) Kubelka-Munk transformed diffuse reflectance spectrum of compound 1.

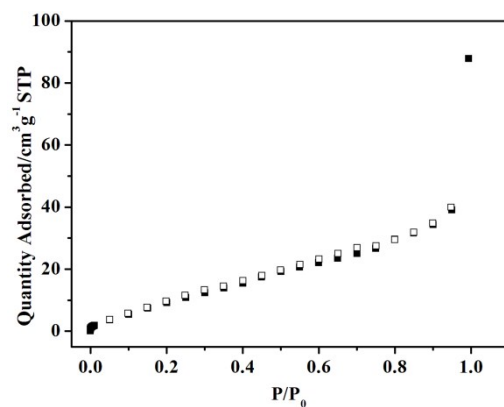

**Fig. S8** N<sub>2</sub> sorption isotherm of compound **1** at 77 K ( $P_0 = 1$  atm).

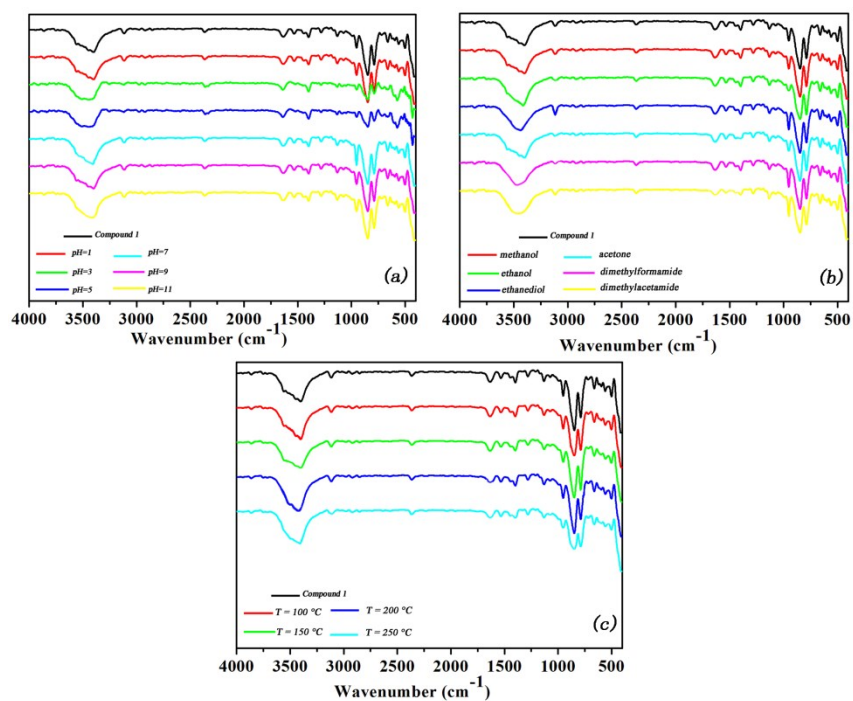

**Fig. S9** The IR spectra of compound **1** (a) immersed in aqueous solutions with different pH for 24 h; (b) soaking in different solvents for 24 h at room temperature; and (c) after heating at different temperature for 12 h, respectively.

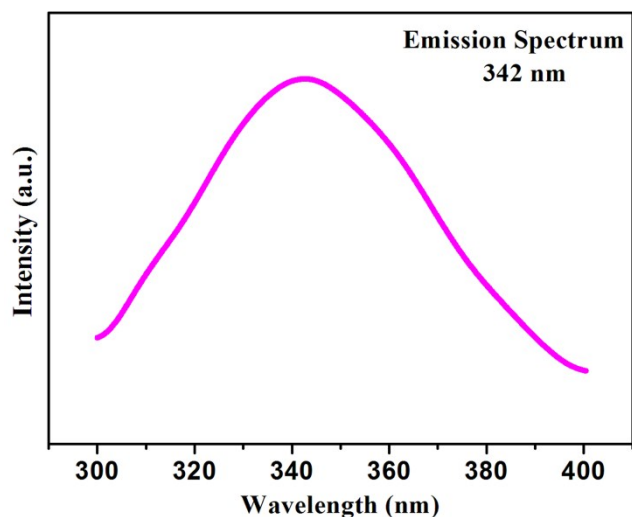

**Fig. S10** Fluorescent spectrum of compound **1**.

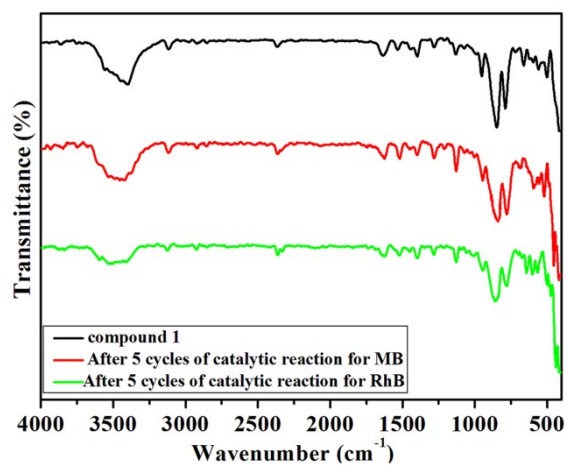

**Fig. S11** The IR spectra of compound **1** before and after cycle reaction.

**Table. S3** The fitting values of the resistance components in the simplified equivalent circuit. (In set of Fig. 7e)

| Electrode | $R_{\Omega}/\Omega \cdot \text{cm}^{-2}$ | $R_1/\Omega \cdot \text{cm}^{-2}$ | $R_2/\Omega \cdot \text{cm}^{-2}$ | $R_{total}^a/\Omega \cdot \text{cm}^{-2}$ |
|-----------|------------------------------------------|-----------------------------------|-----------------------------------|-------------------------------------------|
| Before    | 1.95                                     | 340                               | 64.9                              | 406.9                                     |
| After     | 0.21                                     | 72.9                              | 13.6                              | 86.7                                      |

<sup>a)</sup> $R_{total} = R_{\Omega} + R_1 + R_2$ .

**Table S4** Selected bond lengths (Å) and bond angles (°) of compound **1**

|              |          |              |          |             |          |
|--------------|----------|--------------|----------|-------------|----------|
| Mo(1)-O(1)   | 1.680(3) | Mo(1)-O(3)   | 1.794(5) | Mo(1)-O(2)  | 1.821(7) |
| Mo(1)-O(5)   | 2.037(5) | Mo(1)-O(4)   | 2.116(3) | Mo(1)-O(6)  | 2.280(4) |
| Mo(2)-O(9)   | 1.671(3) | Mo(2)-O(8)   | 1.756(3) | Mo(2)-O(5)  | 2.017(5) |
| Mo(2)-O(6)   | 2.363(4) | Mo(3)-O(10)  | 1.681(6) | Mo(3)-O(11) | 1.832(6) |
| Mo(3)-O(8)   | 2.183(3) | Mo(3)-O(7)   | 2.343(2) | As(1)-O(6)  | 1.693(4) |
| As(1)-O(6)#3 | 1.693(4) | As(1)-O(6)#1 | 1.693(4) | As(1)-O(7)  | 1.696(4) |

|                     |            |                     |            |                    |            |
|---------------------|------------|---------------------|------------|--------------------|------------|
| O(1)-Cu(1)          | 2.315(3)   | O(2)-Mo(2)#4        | 2.089(7)   | O(3)-Mo(2)#3       | 1.832(5)   |
| O(4)-Mo(3)#3        | 1.824(3)   | O(7)-Mo(3)#1        | 2.343(2)   | O(7)-Mo(3)#3       | 2.343(2)   |
| O(11)-Mo(3)#1       | 2.025(6)   | Cu(1)-N(6)#5        | 2.017(12)  | Cu(1)-N(1)         | 2.060(5)   |
| Cu(1)-N(1)#7        | 2.057(5)   | N(6)-Cu(1)#8        | 2.017(12)  |                    |            |
| O(1)-Mo(1)-O(3)     | 114.5(2)   | O(1)-Mo(1)-O(2)     | 99.6(2)    | O(3)-Mo(1)-O(2)    | 98.2(3)    |
| O(1)-Mo(1)-O(5)     | 85.7(2)    | O(3)-Mo(1)-O(5)     | 155.9(2)   | O(2)-Mo(1)-O(5)    | 90.6(3)    |
| O(1)-Mo(1)-O(4)     | 91.26(13)  | O(3)-Mo(1)-O(4)     | 87.86(18)  | O(2)-Mo(1)-O(4)    | 163.9(2)   |
| O(5)-Mo(1)-O(4)     | 78.30(17)  | O(1)-Mo(1)-O(6)     | 155.08(17) | O(3)-Mo(1)-O(6)    | 88.2(2)    |
| O(2)-Mo(1)-O(6)     | 86.3(2)    | O(5)-Mo(1)-O(6)     | 69.96(18)  | O(4)-Mo(1)-O(6)    | 79.03(13)  |
| O(3)#1-Mo(2)-O(5)   | 149.2(2)   | O(9)-Mo(2)-O(2)#2   | 90.9(2)    | O(8)-Mo(2)-O(2)#2  | 163.1(2)   |
| O(3)#1-Mo(2)-O(2)#2 | 64.8(2)    | O(5)-Mo(2)-O(2)#2   | 97.5(2)    | O(9)-Mo(2)-O(6)    | 156.05(16) |
| O(8)-Mo(2)-O(6)     | 87.16(14)  | O(3)#1-Mo(2)-O(6)   | 83.38(19)  | O(5)-Mo(2)-O(6)    | 68.53(18)  |
| O(2)#2-Mo(2)-O(6)   | 81.3(2)    | O(10)-Mo(3)-O(4)#1  | 104.2(3)   | O(4)#1-Mo(3)-O(11) | 95.5(3)    |
| O(4)#1-Mo(3)-O(8)   | 92.59(13)  | O(11)-Mo(3)-O(8)    | 151.0(2)   | O(11)#3-Mo(3)-O(8) | 73.8(2)    |
| O(10)-Mo(3)-O(7)    | 170.5(3)   | O(4)#1-Mo(3)-O(7)   | 85.33(10)  | O(11)-Mo(3)-O(7)   | 74.23(19)  |
| O(8)-Mo(3)-O(7)     | 78.74(9)   | O(6)#3-As(1)-O(6)#1 | 109.78(15) | O(6)#1-As(1)-O(6)  | 109.78(15) |
| Mo(1)-O(1)-Cu(1)    | 158.0(2)   | Mo(1)-O(2)-Mo(2)#4  | 156.7(4)   | Mo(1)-O(3)-Mo(2)#3 | 152.0(3)   |
| Mo(2)-O(5)-Mo(1)    | 121.7(3)   | As(1)-O(6)-Mo(1)    | 123.7(2)   | As(1)-O(6)-Mo(2)   | 118.4(2)   |
| Mo(1)-O(6)-Mo(2)    | 99.39(16)  | As(1)-O(7)-Mo(3)    | 123.59(8)  | Mo(2)-O(8)-Mo(3)   | 135.92(17) |
| N(6)#5-Cu(1)-N(6)#6 | 179.995(3) | N(6)#5-Cu(1)-N(1)   | 95.9(11)   | N(6)#6-Cu(1)-N(1)  | 84.1(11)   |
| N(1)-Cu(1)-N(1)#7   | 179.997(3) |                     |            |                    |            |

Symmetry transformations used to generate equivalent atoms: #1  $-y+1, x-y, z$ ; #2  $x-y+1/3, x-1/3, -z+5/3$ ; #3  $-x+y+1, -x+1, z$ ; #4  $y+1/3, -x+y+2/3, -z+5/3$ ; #5  $-y+4/3, x-y+2/3, z+2/3$ ; #6  $y+1/3, -x+y+2/3, -z+2/3$ ; #7  $-x+5/3, -y+4/3, -z+4/3$ ; #8  $-x+y+2/3, -x+4/3, z-2/3$
